# Supplementary material
Source: PubMed Central journal article supplement (PMC7751062)
Supplement: NIHMS1649746-supplement-Supplementary_Information_1.pdf [file NIHMS1649746-supplement-Supplementary_Information_1.pdf]

**Figure 1. Study flowchart. MEQ: Mystical Experience Questionnaire; PEQ: Persisting Effects**

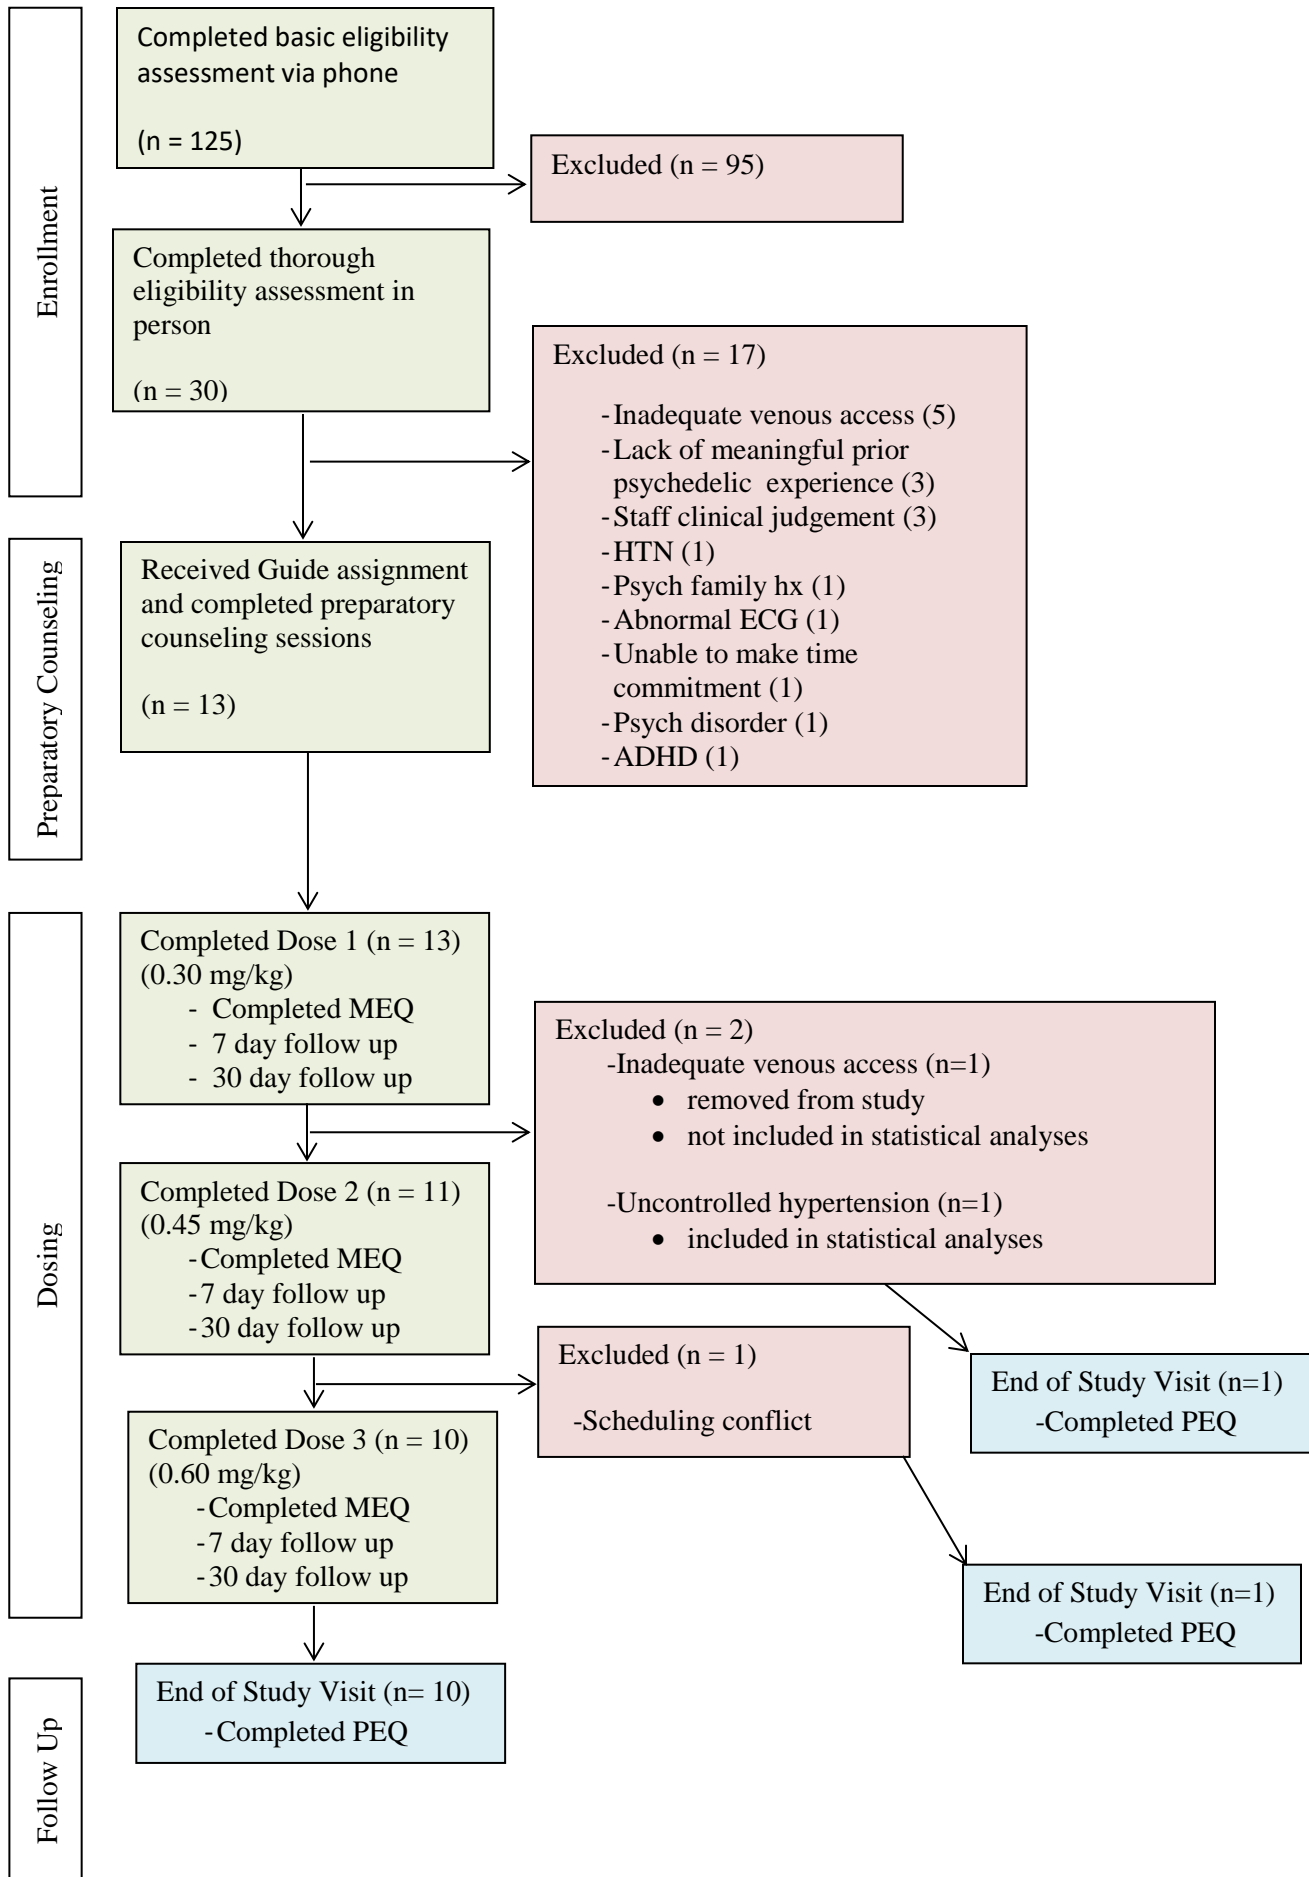

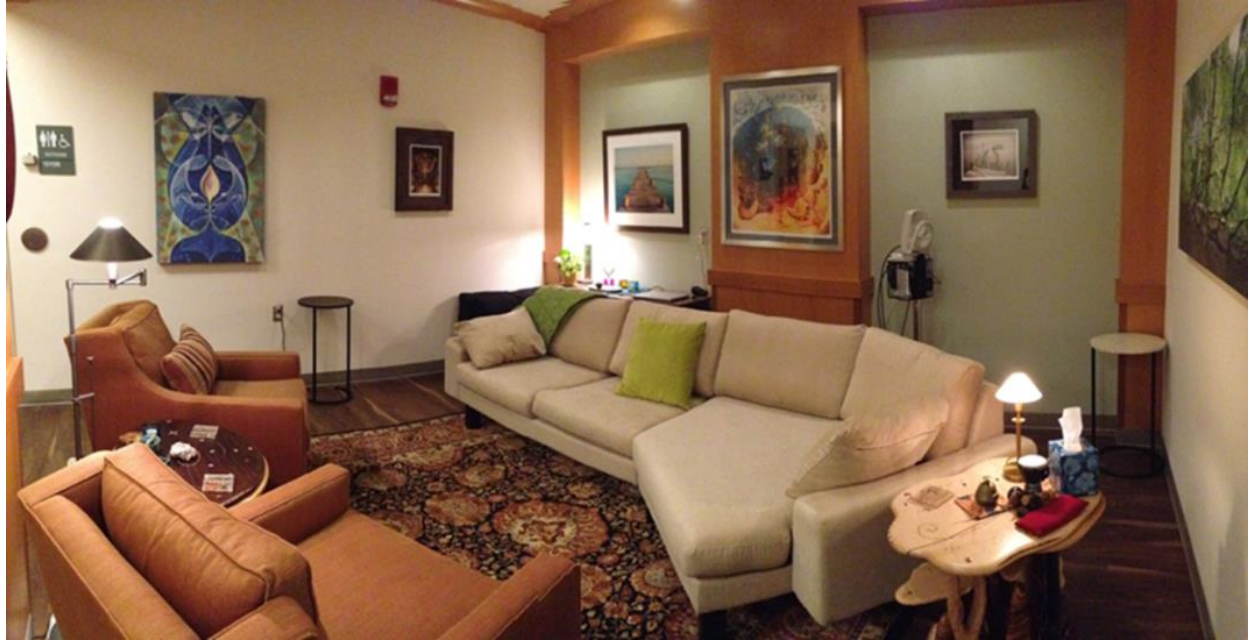

Study room in the University of Wisconsin-Madison School of Pharmacy
