# Supplementary material
Source: PubMed Central journal article supplement (PMC7751062)

## Supplemental Table

Complete mystical experience across participant by dose

| Participant | Dose 1<br>(n=12) | Dose 2<br>(n=11) | Dose 3<br>(n=10) | Rate   |
|-------------|------------------|------------------|------------------|--------|
| 1           | no               | yes              | yes              | 66.67% |
| 2           | no               | no               | no               | 0%     |
| 3           | no               | no               | no               | 0%     |
| 4           | no               | no               | no               | 0%     |
| 5           | yes              | no               | no               | 33.3%  |
| 6           | no               | yes              | no               | 33.3%  |
| 7           | yes              | yes              | x                | 66.67% |
| 8           | yes              | yes              | no               | 66.67% |
| 9           | no               | no               | yes              | 33.3%  |
| 10          | no               | x                | x                | 0%     |
| 11          | yes              | yes              | yes              | 100%   |
| 12          | no               | no               | no               | 0%     |

Participant order randomized. yes =participant achieved a complete mystical experience as defined below. x = dose was not administered. Data from each of the four Mystical Experience Questionnaire (MEQ) subscales were expressed as a percentage of the maximum possible score. A “complete” mystical experience was defined as scoring greater than or equal to 60% on each of the four subscales: mystical, transcendence of time and space, positive mood, and ineffability; the criteria used were determined based on previous studies (Griffiths et al., 2006, 2011; Pahnke, 1969).

## Supplemental Table 2

### Question 1

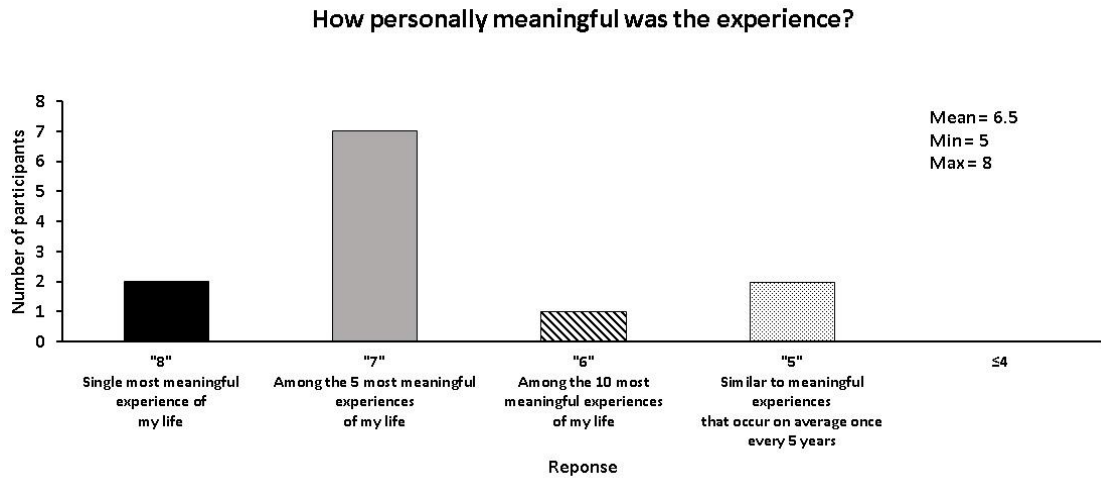

### Question 2

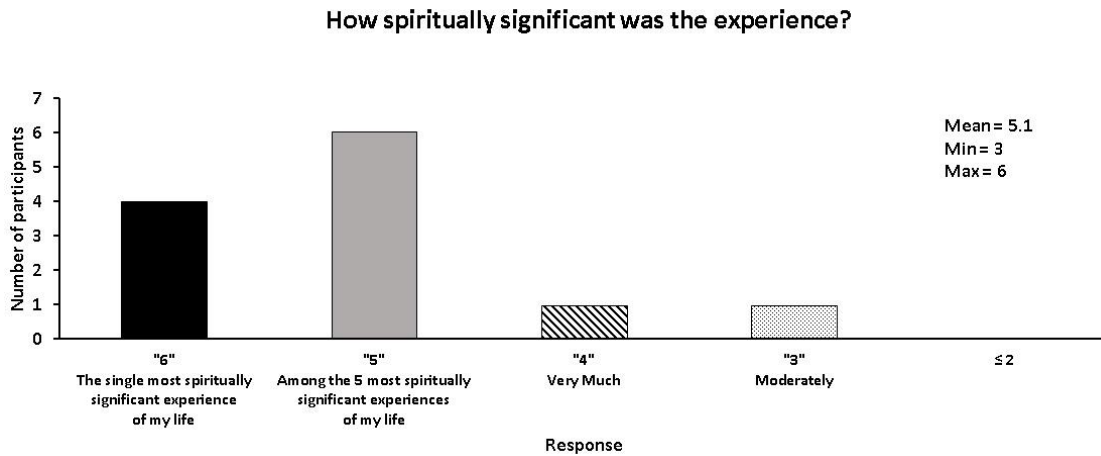

### Question 3

### Did the experience change your sense of well-being or life satisfaction?

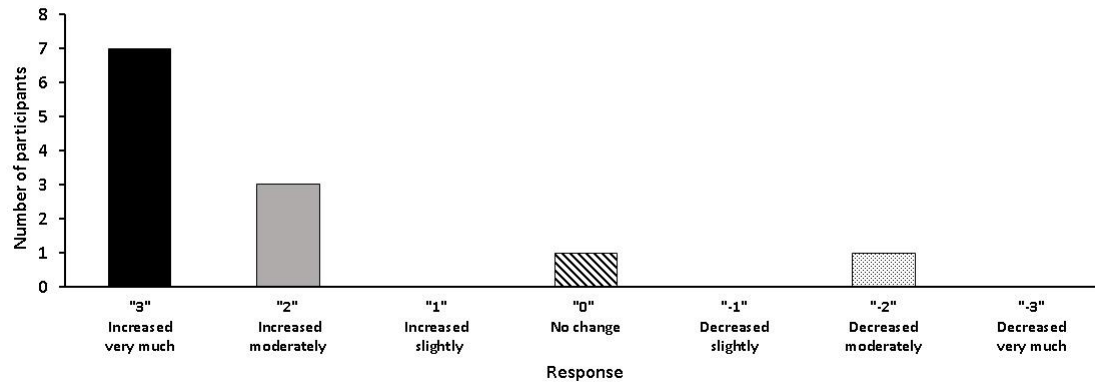

Supplement: NIHMS1649746-supplement-Supplementary_Information_2.pdf [file NIHMS1649746-supplement-Supplementary_Information_2.pdf]
